# Supplementary material
Source: HighWire-hosted journal article supplement (https://jnm.snmjournals.org/highwire/filestream/99064/field_highwire_adjunct_files/0/236075_Supplemental_Data.pdf)
Supplement: 236075_Supplemental_Data.pdf [file 236075_Supplemental_Data.pdf]

**Supplemental Table 1:** Descriptive data of lesion- and- patient-based uptake metrics on test and retest scans for PSF-reconstruction images.

|                           | Test   |               | Retest |               |
|---------------------------|--------|---------------|--------|---------------|
|                           | Median | Range         | Median | Range         |
| <b>Lesion-level</b>       |        |               |        |               |
| <i>Volume</i>             | 3.4    | 2.0 – 7.8     | 3.6    | 1.9 – 7.5     |
| <i>SUV<sub>mean</sub></i> | 25.0   | 15.0 – 40.3   | 24.2   | 14.9 – 47.2   |
| <i>SUV<sub>peak</sub></i> | 27.2   | 15.3 – 38.8   | 29.5   | 16.3 – 48.8   |
| <i>SUV<sub>max</sub></i>  | 52.9   | 29.2 – 93.9   | 47.1   | 29.5 – 98.6   |
| <i>TBR<sub>mean</sub></i> | 19.7   | 11.6 – 33.7   | 19.4   | 13.1 – 34.1   |
| <i>TBR<sub>peak</sub></i> | 23.8   | 10.4 – 37.7   | 23.0   | 13.2 – 36.0   |
| <i>TBR<sub>max</sub></i>  | 49.3   | 22.0 – 83.3   | 36.8   | 26.9 – 76.1   |
| <i>TLU<sub>SUV</sub></i>  | 100.3  | 38.5 – 223.0  | 99.9   | 35.6 – 240.9  |
| <i>TLU<sub>TBR</sub></i>  | 84.0   | 29.2 – 213.1  | 82.2   | 27.1 – 255.7  |
| <b>Patient-level</b>      |        |               |        |               |
| <i>TTV</i>                | 17.2   | 7.5 – 46.0    | 17.9   | 7.8 – 47.0    |
| <i>TTB<sub>SUV</sub></i>  | 375.3  | 74.6 – 1909.1 | 340.9  | 77.4 – 2094.6 |
| <i>TTB<sub>TBR</sub></i>  | 276.9  | 66.3 – 1933.5 | 263.5  | 74.8 – 2215.6 |

*IQR = interquartile range; SUV = Standardized Uptake Value; TBR = Tumor-to-Blood Ratio; TLU = Total Lesion Uptake; TTV = Total Tumor Volume; TTB = Total Tumor Burden*

**Supplemental Table 2:** Repeatability of lesion and patient-based uptake metrics for PSF-reconstruction images. *P*-value indicates a significant differences in repeatability between original (non-PSF) and PSF-reconstructions.

| Parameter                 | Mean test-retest difference % | RC%  | ICC (95% CI)     | <i>p</i> -value<br><i>non-PSF vs. PSF</i> |
|---------------------------|-------------------------------|------|------------------|-------------------------------------------|
| <b>Lesion-level</b>       |                               |      |                  |                                           |
| <i>Volume</i>             | 0.1                           | 32.0 | 1.00 (1.00-1.00) | 0.427                                     |
| <i>SUV<sub>mean</sub></i> | 0.6                           | 32.3 | 0.97 (0.95-0.99) | <b>0.005</b>                              |
| <i>SUV<sub>peak</sub></i> | 2.2                           | 27.8 | 0.98 (0.97-0.99) | 0.147                                     |
| <i>SUV<sub>max</sub></i>  | -0.9                          | 52.1 | 0.87 (0.77-0.93) | <b>&lt;0.001</b>                          |
| <i>TBR<sub>mean</sub></i> | 2.2                           | 41.7 | 0.96 (0.92-0.98) | <b>&lt;0.001</b>                          |
| <i>TBR<sub>peak</sub></i> | 3.7                           | 38.1 | 0.97 (0.94-0.98) | <b>&lt;0.001</b>                          |
| <i>TBR<sub>max</sub></i>  | 0.7                           | 58.9 | 0.88 (0.78-0.94) | <b>&lt;0.001</b>                          |
| <i>TLU<sub>SUV</sub></i>  | 0.7                           | 30.3 | 0.99 (0.98-0.99) | 0.616                                     |
| <i>TLU<sub>TBR</sub></i>  | 2.2                           | 41.3 | 0.97 (0.95-0.99) | 0.699                                     |
| <b>Patient-level</b>      |                               |      |                  |                                           |
| <i>TTV</i>                | 1.7                           | 13.9 | 1.00 (1.00-1.00) | 0.152                                     |
| <i>TTB<sub>SUV</sub></i>  | 1.9                           | 23.4 | 0.99 (0.98-1.00) | 0.952                                     |
| <i>TTB<sub>TBR</sub></i>  | 3.9                           | 37.6 | 0.98 (0.92-1.00) | 0.588                                     |
